# Supplementary material
Source: ML conference proceedings conference paper supplement (https://openreview.net/forum?id=CUeX_YeX9n_)
Supplement: supplementary_material [file attachment]

---

# Self-Supervised Adversarial Example Detection by Disentangled Representation

---

Anonymous Author(s)

Affiliation

Address

email

1 This document contains the full experimental results that support the work titled “Self-Supervised  
2 Adversarial Example Detection via Disentangled Representation”.

3 In order to verify the efficiency of DRR, we prepare adversarial examples generated by 5 kinds of  
4 attack methods (FGSM, BIM, PGD, DeepFool, CW) with 3 different norms ( $L_1$ ,  $L_2$ ,  $L_{inf}$ ) over the  
5 datasets MNIST, Fashion-MNIST, CIFAR-10.

6 Table 1, Table 3, and Table 5 respectively report the accuracy of the victim models on benign test  
7 examples and various adversarial examples. It is clear that DeepFool and CW attacks are stronger  
8 than FGSM, BIM, and PGD, and CW is the strongest attack. It is also true that for a specific attack  
9 and a given norm, the success rate of the attack is becoming higher as the value of the norm increases  
10 (model accuracy becomes lower).

11 Figure 4 depicts some reconstruction results of all the detectors: DRR, HLR-P, HLR-L, HVR-P,  
12 HVR-L. It is very clear that when reconstructing adversarial examples, HVR-P and HVR-L generally  
13 produce a small Reconstruction Error (RE), which means that the manifold directly draw by the AE is  
14 too large (we call this unnecessary generalization capability over adversarial examples). And HLR-P  
15 and HLR-L generally produce a reconstructed image with large RE, but sometimes they still fail (for  
16 example, rows 5 and 7 of the left part, rows 3 and 4 of the middle part of Fig. 4). These observations  
17 indicate that logits (outputted by the victim model) is a good choice to further constrain the volume  
18 of the manifold drawn by AE (so to reduce the unnecessary generalization capability over adversarial  
19 examples), but it is not always enough. By disentangling the representation of image as semantic  
20 and class features (we use logits as our class feature), DRR can mimic the behavior of adversarial  
21 examples to even better reduce unnecessary generalization capability of the encoder-decoder network.

22 Figures 1, 3, 2 box-plot the values of REs of all the benign test and adversarial examples for CIFAR-  
23 10, MNIST, Fashion-MNIST, respectively. From these figures, it is clear REs from HVR-P, HVR-L  
24 are most of the time mixed. For HLR-P and HLR-L, if we look at specific attack on a fixed dataset,  
25 it seems that it works as good as DRR. However, to put detector into real usage, it should have a  
26 universal threshold value for all the possible attacks against a fixed dataset. From this view, HLR-P  
27 and HLR-L perform worse than DRR, even if we can use another offline technique to learn this  
28 threshold value (by assuming we know all the possible attacks).

29 For quantitative comparison, Tables 2, 4, 6 list all the AUC values of the ROC of the detectors with  
30 respect to all the attacks over the three datasets. The general trend in these three tables is, the large  
31 the value of the norm (used for the attack), the large the AUC value, i.e., attacks with larger norm  
32 can be detected easier. And it is also clear that DRR has the highest value of AUC over all the three  
33 datasets. Specifically, for CIFAR-10 (Table 2), DRR has an AUC value larger than 0.99, which is  
34 close to the ideal value 1.

Table 1: Test accuracy of the victim models on CIFAR-10.

| Attack   | Norm                       | VGG   |
|----------|----------------------------|-------|
|          | benign                     | 0.869 |
| BIM      | $L_1 \epsilon = 5$         | 0.588 |
|          | $L_1 \epsilon = 10$        | 0.298 |
|          | $L_2 \epsilon = 0.1$       | 0.702 |
|          | $L_2 \epsilon = 0.3$       | 0.252 |
|          | $L_{inf} \epsilon = 0.005$ | 0.500 |
|          | $L_{inf} \epsilon = 0.01$  | 0.195 |
| PGD      | $L_1 \epsilon = 5$         | 0.665 |
|          | $L_1 \epsilon = 10$        | 0.411 |
|          | $L_2 \epsilon = 0.1$       | 0.744 |
|          | $L_2 \epsilon = 0.3$       | 0.352 |
|          | $L_{inf} \epsilon = 0.005$ | 0.553 |
|          | $L_{inf} \epsilon = 0.01$  | 0.267 |
| FGSM     | $L_1 \epsilon = 5$         | 0.651 |
|          | $L_1 \epsilon = 10$        | 0.457 |
|          | $L_2 \epsilon = 0.3$       | 0.431 |
|          | $L_2 \epsilon = 1$         | 0.170 |
|          | $L_{inf} \epsilon = 0.01$  | 0.352 |
|          | $L_{inf} \epsilon = 0.05$  | 0.092 |
| DeepFool | $L_2$                      | 0.039 |
|          | $L_{inf}$                  | 0.054 |
| CW       | $L_2$                      | 0.001 |

Table 2: AUC of ROC of different detectors over CIFAR-10.

| Attack   | Norm                       | VGG    |        |        |        |               |
|----------|----------------------------|--------|--------|--------|--------|---------------|
|          |                            | HVR-P  | HLR-P  | HVR-L  | HLR-L  | DRR (ours)    |
| BIM      | $L_1 \epsilon = 5$         | 0.4380 | 0.5996 | 0.4364 | 0.8515 | <b>0.9975</b> |
|          | $L_1 \epsilon = 10$        | 0.4533 | 0.6173 | 0.4556 | 0.8806 | <b>0.9985</b> |
|          | $L_2 \epsilon = 0.1$       | 0.4312 | 0.5947 | 0.4358 | 0.8516 | <b>0.9981</b> |
|          | $L_2 \epsilon = 0.3$       | 0.4650 | 0.6231 | 0.4670 | 0.8892 | <b>0.9990</b> |
|          | $L_{inf} \epsilon = 0.005$ | 0.4549 | 0.5973 | 0.4554 | 0.8610 | <b>0.9981</b> |
|          | $L_{inf} \epsilon = 0.01$  | 0.4755 | 0.6340 | 0.4766 | 0.9039 | <b>0.9992</b> |
| PGD      | $L_1 \epsilon = 5$         | 0.4313 | 0.5981 | 0.4286 | 0.8516 | <b>0.9982</b> |
|          | $L_1 \epsilon = 10$        | 0.4436 | 0.6020 | 0.4446 | 0.8644 | <b>0.9985</b> |
|          | $L_2 \epsilon = 0.1$       | 0.4411 | 0.5992 | 0.4469 | 0.8568 | <b>0.9988</b> |
|          | $L_2 \epsilon = 0.3$       | 0.4594 | 0.6105 | 0.4613 | 0.8742 | <b>0.9983</b> |
|          | $L_{inf} \epsilon = 0.005$ | 0.4530 | 0.5978 | 0.4546 | 0.8606 | <b>0.9982</b> |
|          | $L_{inf} \epsilon = 0.01$  | 0.4704 | 0.6199 | 0.4723 | 0.8856 | <b>0.9990</b> |
| FGSM     | $L_1 \epsilon = 5$         | 0.4347 | 0.5948 | 0.4350 | 0.8560 | <b>0.9981</b> |
|          | $L_1 \epsilon = 10$        | 0.4535 | 0.6134 | 0.4554 | 0.8550 | <b>0.9982</b> |
|          | $L_2 \epsilon = 0.3$       | 0.4622 | 0.6139 | 0.4639 | 0.8571 | <b>0.9977</b> |
|          | $L_2 \epsilon = 1$         | 0.5146 | 0.6544 | 0.5157 | 0.8709 | <b>0.9981</b> |
|          | $L_{inf} \epsilon = 0.01$  | 0.4841 | 0.6205 | 0.4854 | 0.8620 | <b>0.9980</b> |
|          | $L_{inf} \epsilon = 0.05$  | 0.6620 | 0.7000 | 0.6430 | 0.8207 | <b>0.9977</b> |
| DeepFool | $L_2$                      | 0.5083 | 0.6621 | 0.5098 | 0.8251 | <b>0.9953</b> |
|          | $L_{inf}$                  | 0.5051 | 0.6518 | 0.5038 | 0.8167 | <b>0.9954</b> |
| CW       | $L_2$                      | 0.5020 | 0.6562 | 0.5019 | 0.8298 | <b>0.9982</b> |

Table 3: Test accuracy of the victim models over Fashion-MNIST.

| Attack   | Norm                      | CNN   |
|----------|---------------------------|-------|
|          | benign                    | 0.926 |
| BIM      | $L_1 \epsilon = 20$       | 0.300 |
|          | $L_1 \epsilon = 50$       | 0.290 |
|          | $L_2 \epsilon = 2$        | 0.322 |
|          | $L_2 \epsilon = 5$        | 0.313 |
|          | $L_{inf} \epsilon = 0.01$ | 0.587 |
|          | $L_{inf} \epsilon = 0.05$ | 0.021 |
| PGD      | $L_1 \epsilon = 10$       | 0.294 |
|          | $L_1 \epsilon = 20$       | 0.207 |
|          | $L_2 \epsilon = 1$        | 0.240 |
|          | $L_2 \epsilon = 2$        | 0.095 |
|          | $L_{inf} \epsilon = 0.01$ | 0.633 |
|          | $L_{inf} \epsilon = 0.05$ | 0.008 |
| FGSM     | $L_1 \epsilon = 20$       | 0.509 |
|          | $L_1 \epsilon = 50$       | 0.425 |
|          | $L_2 \epsilon = 5$        | 0.437 |
|          | $L_{inf} \epsilon = 0.01$ | 0.731 |
|          | $L_{inf} \epsilon = 0.05$ | 0.327 |
| DeepFool | $L_2$                     | 0.233 |
|          | $L_{inf}$                 | 0.052 |
| CW       | $L_2$                     | 0.003 |

Table 4: AUC of ROC of different detectors over Fashion-MNIST.

| Attack   | Norm                      | CNN    |               |               |        |               |
|----------|---------------------------|--------|---------------|---------------|--------|---------------|
|          |                           | HVR-P  | HLR-P         | HVR-L         | HLR-L  | DRR (ours)    |
| BIM      | $L_1 \epsilon = 20$       | 0.5420 | 0.8311        | 0.5481        | 0.8419 | <b>0.8944</b> |
|          | $L_1 \epsilon = 50$       | 0.6018 | 0.8484        | 0.6253        | 0.8591 | <b>0.9269</b> |
|          | $L_2 \epsilon = 2$        | 0.5716 | 0.8004        | 0.5800        | 0.8244 | <b>0.9050</b> |
|          | $L_2 \epsilon = 5$        | 0.7015 | 0.8391        | 0.7254        | 0.8563 | <b>0.9248</b> |
|          | $L_{inf} \epsilon = 0.01$ | 0.4920 | 0.9210        | 0.4917        | 0.9323 | <b>0.9596</b> |
|          | $L_{inf} \epsilon = 0.05$ | 0.5255 | 0.8295        | 0.5389        | 0.8419 | <b>0.8880</b> |
| PGD      | $L_1 \epsilon = 10$       | 0.5177 | 0.9532        | 0.5183        | 0.9592 | <b>0.9830</b> |
|          | $L_1 \epsilon = 20$       | 0.5658 | 0.9654        | 0.5797        | 0.9679 | <b>0.9852</b> |
|          | $L_2 \epsilon = 1$        | 0.5614 | 0.9610        | 0.5728        | 0.9662 | <b>0.9858</b> |
|          | $L_2 \epsilon = 2$        | 0.6972 | 0.9654        | 0.7259        | 0.9709 | <b>0.9914</b> |
|          | $L_{inf} \epsilon = 0.01$ | 0.4981 | 0.9259        | 0.4997        | 0.9347 | <b>0.9589</b> |
|          | $L_{inf} \epsilon = 0.05$ | 0.5267 | 0.8439        | 0.5415        | 0.8555 | <b>0.9000</b> |
| FGSM     | $L_1 \epsilon = 20$       | 0.6091 | 0.9362        | 0.6147        | 0.9455 | <b>0.9687</b> |
|          | $L_1 \epsilon = 50$       | 0.8390 | 0.9469        | 0.8489        | 0.9574 | <b>0.9825</b> |
|          | $L_2 \epsilon = 5$        | 0.9628 | 0.9068        | <b>0.9673</b> | 0.9008 | 0.9010        |
|          | $L_{inf} \epsilon = 0.01$ | 0.5281 | 0.9183        | 0.5253        | 0.9270 | <b>0.9536</b> |
|          | $L_{inf} \epsilon = 0.05$ | 0.6113 | <b>0.9201</b> | 0.6298        | 0.9193 | 0.9192        |
| DeepFool | $L_2$                     | 0.6204 | 0.9333        | 0.6267        | 0.9516 | <b>0.9696</b> |
|          | $L_{inf}$                 | 0.6137 | 0.9088        | 0.6270        | 0.9273 | <b>0.9378</b> |
| CW       | $L_2$                     | 0.5068 | 0.8981        | 0.5013        | 0.9058 | <b>0.9125</b> |

Table 5: Test accuracy of the victim models over MNIST.

| Attack   | Norm                     | CNN   |
|----------|--------------------------|-------|
|          | benign                   | 0.993 |
| BIM      | $L_1 \epsilon = 20$      | 0.277 |
|          | $L_1 \epsilon = 50$      | 0.012 |
|          | $L_2 \epsilon = 2$       | 0.061 |
|          | $L_2 \epsilon = 5$       | 0.002 |
|          | $L_{inf} \epsilon = 0.1$ | 0.407 |
|          | $L_{inf} \epsilon = 0.3$ | 0.001 |
| PGD      | $L_1 \epsilon = 10$      | 0.882 |
|          | $L_1 \epsilon = 20$      | 0.503 |
|          | $L_2 \epsilon = 1$       | 0.724 |
|          | $L_2 \epsilon = 2$       | 0.086 |
|          | $L_{inf} \epsilon = 0.1$ | 0.443 |
|          | $L_{inf} \epsilon = 0.3$ | 0.000 |
| FGSM     | $L_1 \epsilon = 20$      | 0.800 |
|          | $L_1 \epsilon = 50$      | 0.340 |
|          | $L_2 \epsilon = 2$       | 0.596 |
|          | $L_2 \epsilon = 5$       | 0.173 |
|          | $L_{inf} \epsilon = 0.1$ | 0.762 |
| DeepFool | $L_2$                    | 0.080 |
|          | $L_{inf}$                | 0.078 |
| CW       | $L_2$                    | 0.000 |

Table 6: AUC of ROC of different detectors over MNIST.

| Attack   | Norm                     | CNN    |               |        |               |               |
|----------|--------------------------|--------|---------------|--------|---------------|---------------|
|          |                          | HVR-P  | HLR-P         | HVR-L  | HLR-L         | DRR (ours)    |
| BIM      | $L_1 \epsilon = 20$      | 0.3823 | <b>0.9960</b> | 0.4183 | 0.9931        | 0.9955        |
|          | $L_1 \epsilon = 50$      | 0.7572 | 0.8876        | 0.7391 | 0.8968        | <b>0.9714</b> |
|          | $L_2 \epsilon = 2$       | 0.4037 | 0.9978        | 0.4449 | 0.9925        | <b>0.9981</b> |
|          | $L_2 \epsilon = 5$       | 0.9119 | 0.9156        | 0.8904 | 0.9124        | <b>0.9790</b> |
|          | $L_{inf} \epsilon = 0.1$ | 0.0946 | 0.9780        | 0.1057 | 0.9806        | <b>0.9864</b> |
|          | $L_{inf} \epsilon = 0.3$ | 0.4711 | 0.8509        | 0.3972 | 0.8672        | <b>0.9939</b> |
| PGD      | $L_1 \epsilon = 10$      | 0.3006 | <b>0.9959</b> | 0.3363 | 0.9939        | 0.9741        |
|          | $L_1 \epsilon = 20$      | 0.2285 | <b>0.9926</b> | 0.2772 | 0.9894        | 0.9895        |
|          | $L_2 \epsilon = 1$       | 0.2313 | <b>0.9897</b> | 0.2633 | 0.9886        | 0.9691        |
|          | $L_2 \epsilon = 2$       | 0.1645 | 0.9948        | 0.2149 | 0.9915        | <b>0.9977</b> |
|          | $L_{inf} \epsilon = 0.1$ | 0.0796 | 0.9752        | 0.0946 | 0.9795        | <b>0.9854</b> |
|          | $L_{inf} \epsilon = 0.3$ | 0.5226 | 0.8291        | 0.4350 | 0.8551        | <b>0.9970</b> |
| FGSM     | $L_1 \epsilon = 20$      | 0.3609 | <b>0.9856</b> | 0.3771 | 0.9849        | 0.9557        |
|          | $L_1 \epsilon = 50$      | 0.5697 | 0.9765        | 0.5585 | 0.9753        | <b>0.9819</b> |
|          | $L_2 \epsilon = 2$       | 0.3968 | 0.9766        | 0.4059 | <b>0.9767</b> | 0.9647        |
|          | $L_2 \epsilon = 5$       | 0.8534 | 0.9810        | 0.8134 | 0.9810        | <b>0.9916</b> |
|          | $L_{inf} \epsilon = 0.1$ | 0.0724 | 0.9352        | 0.0811 | <b>0.9569</b> | 0.9367        |
| DeepFool | $L_2$                    | 0.6801 | <b>0.9921</b> | 0.6879 | 0.9855        | 0.9694        |
|          | $L_{inf}$                | 0.3824 | 0.9653        | 0.4301 | 0.9748        | <b>0.9815</b> |
| CW       | $L_2$                    | 0.7211 | <b>0.9871</b> | 0.6947 | 0.9828        | 0.9750        |

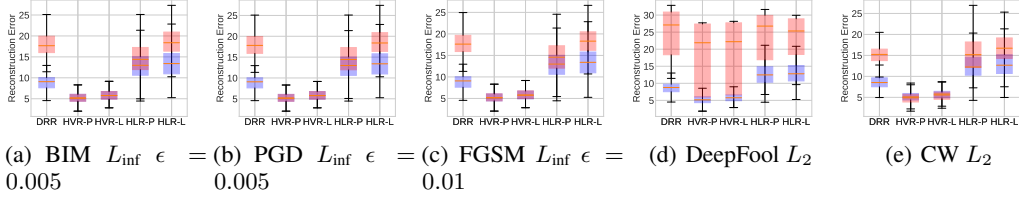

Figure 1: Box-plot of the reconstruction errors for CIFAR-10 (red box is for adversarial and blue box is for benign).

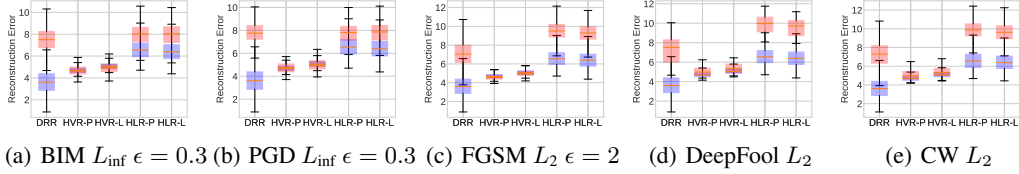

Figure 2: Box-plot of the reconstruction errors for MNIST (red box is for adversarial and blue box is for benign).

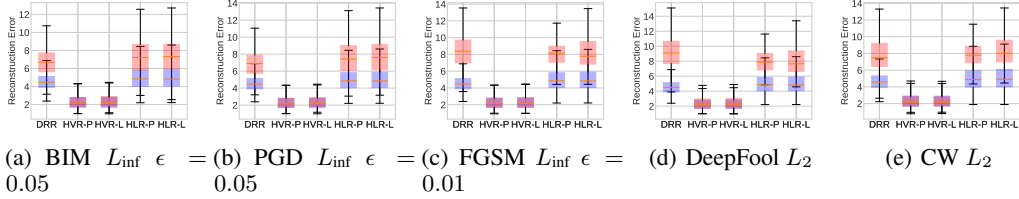

Figure 3: Box-plot of the reconstruction errors for Fashion-MNIST (red box is for adversarial and blue box is for benign).

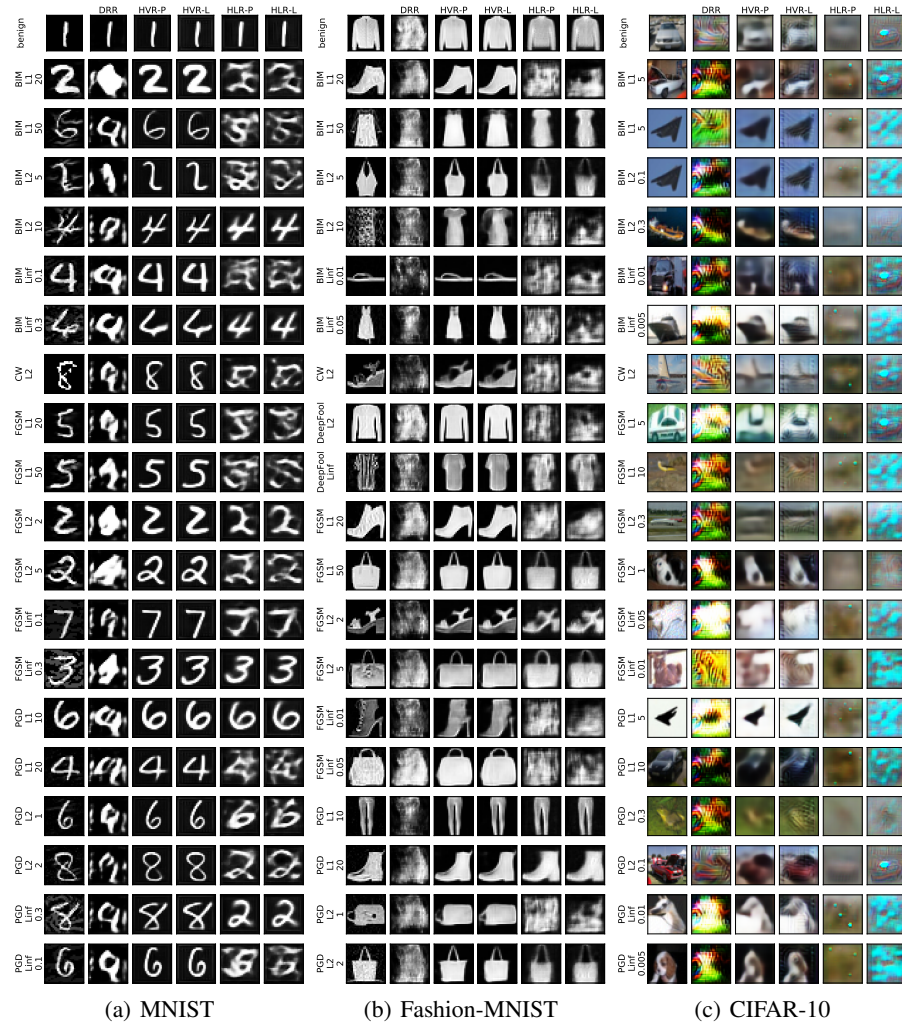

Figure 4: Reconstructed images of each detection methods over different datasets.
